# Supplementary material
Source: PubMed Central journal article supplement (PMC9348887)
Supplement: j-55-00813-sup27.pdf [file j-55-00813-sup27.pdf]

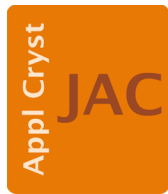

JOURNAL OF  
APPLIED  
CRYSTALLOGRAPHY

**Volume 55 (2022)**

**Supporting information for article:**

**Combination of an inject-and-transfer system for serial femtosecond crystallography**

**Keondo Lee, Jihan Kim, Sangwon Baek, Jaehyun Park, Sehan Park, Jong-Lam Lee, Wan Kyun Chung, Yunje Cho and Ki Hyun Nam**

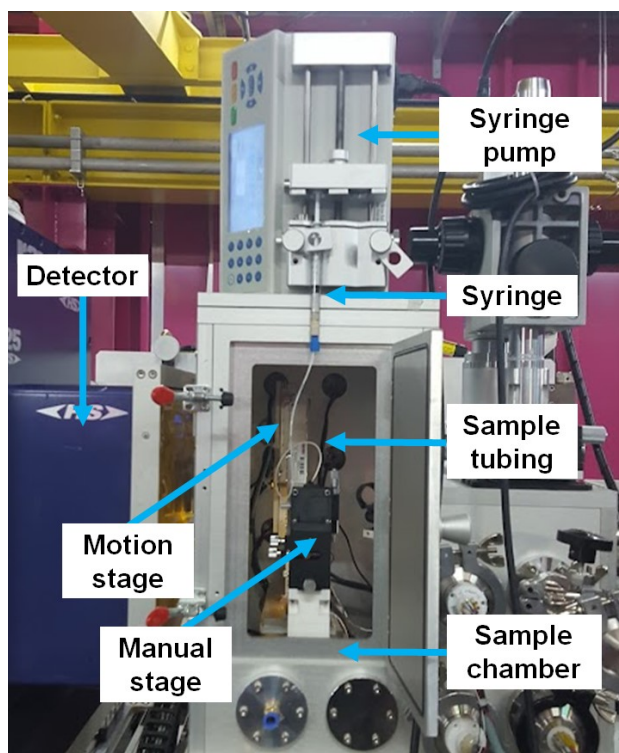

**Figure S1** Photo of experimental setup of the BITS at PAL-XFEL..

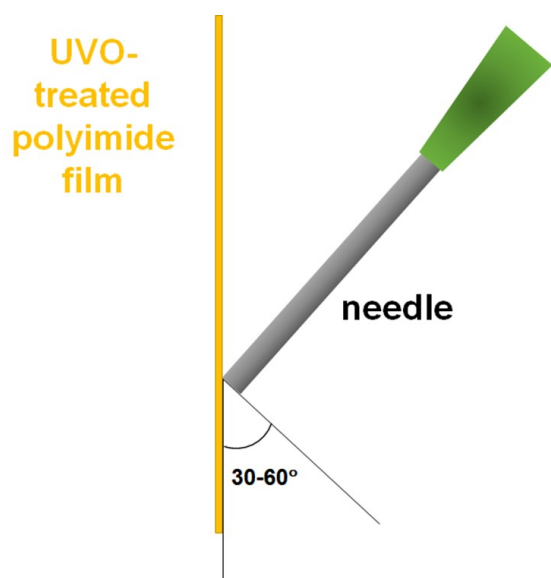

**Figure S2** Schematic drawing of the injection needle attached to the UVO-treated polyimide film.

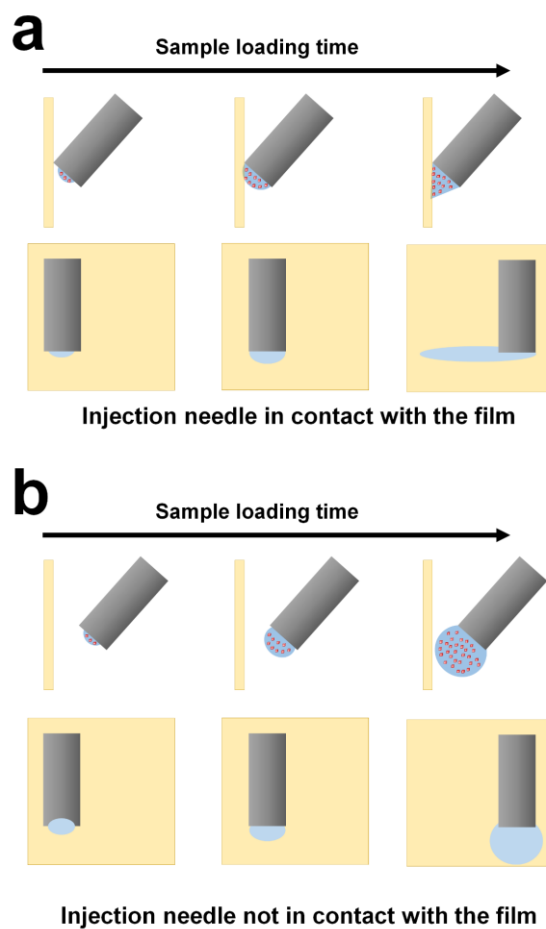

**Figure S3** Schematic drawing of the difference in sample deposition according to injection needle (a) contact and (b) non-contact with UVO-treated polyimide film.

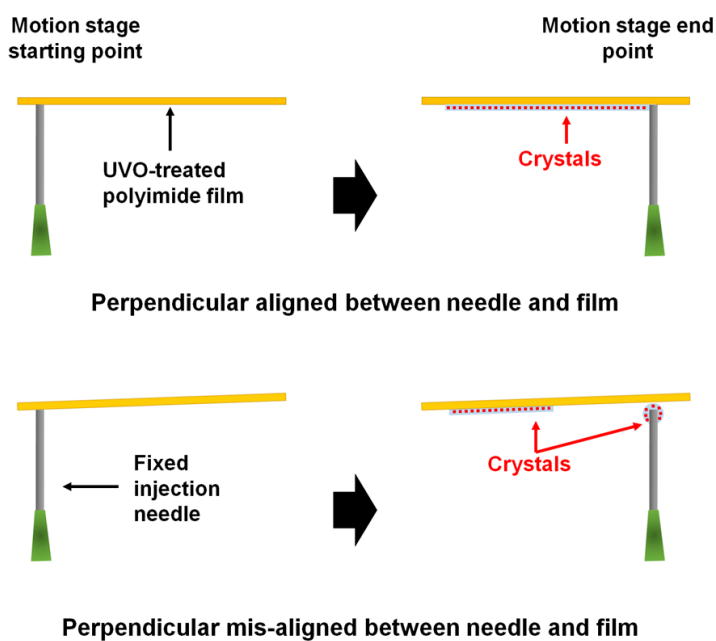

**Figure S4** Schematic drawing of differences in sample deposition according to perpendicular (a) aligned and (b) misaligned UVO-treated polyimide film with the injection needle.

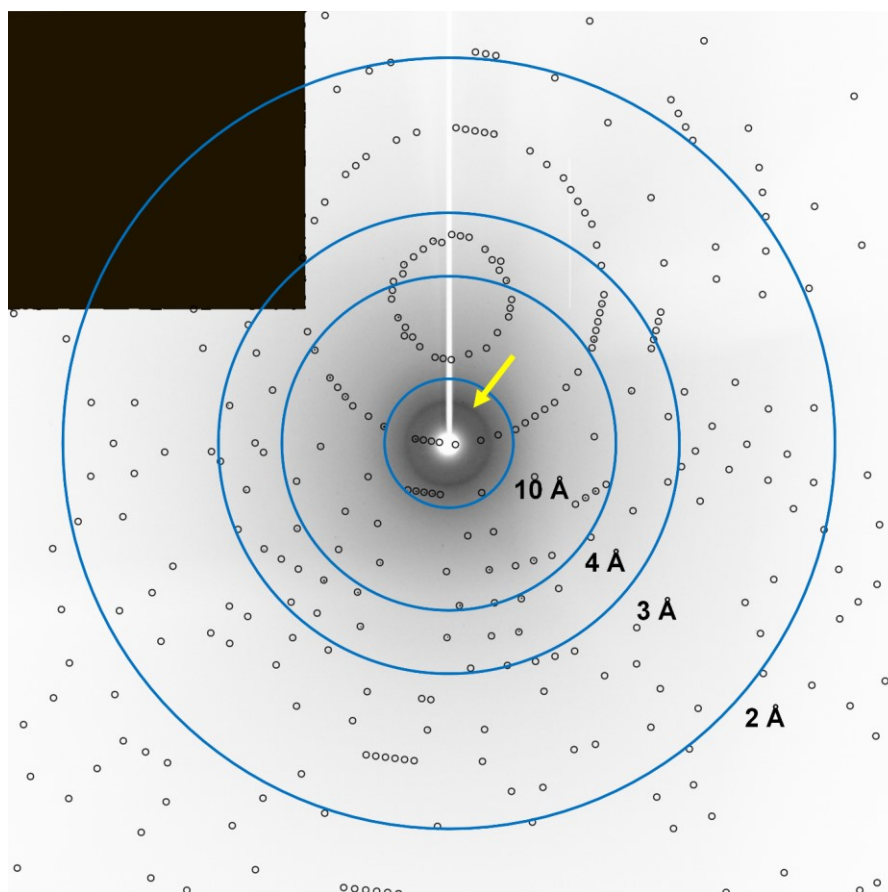

**Figure S5** Typical diffraction image of lysozyme embedded in lard material delivered by BITS. The background scattering of lard material is indicated by the yellow arrow. The circles indicate the Bragg peak positions predicted by CrytFEL.

**Table S1.** The translation code used in BITS system.

```
cv::Point2d start_pt;

int step_size_x = 50; // um

int step_size_y = 5000; // um

int sub_step_size_x = 50; // um

int sub_step_size_y = 150; // um

int chip_size_x = 30000; // X-axis scan range [um]

int chip_size_y = step_size_y*5; // Y-axis scan range [um]

int sub_step_x = (int)chip_size_x / sub_step_size_x;

double waitingTime; // Timer

LARGE_INTEGER clockStart, clockEnd, clockFreq; // Timer

// Get Start Location

start_pt.x = static_cast<double>(smaract_mcs2->get_position(smaract_ch_x));

start_pt.y = static_cast<double>(smaract_mcs2->get_position(smaract_ch_y));

//===== BITS Scan code =====//

for (int i = 0; i < step_y && SCANNING_ON; i++) {

    // Start time measurement

    QueryPerformanceFrequency(&clockFreq); // Timer

    QueryPerformanceCounter(&clockStart); // Timer

    // Set the travel speed of Smaract stage

    smaract_mcs2->set_velocity(smaract_ch_x, step_size_x * 30);

    smaract_mcs2->set_velocity(smaract_ch_y, step_size_x * 30);

    //----- Scan code -----

    //  □ □ □ □ □ □ □ □ □
    //  | | | | | | | | | | | | | | |
```





```
zmq_send(publisher, scanning_status.data(), scanning_status.size(), ZMQ_NOBLOCK);  
}
```
